# Supplementary material
Source: Springer Nature journal article supplement (https://www.springermedizin.de/resource/supplementary/13256_2014_2963_MOESM1_ESM.pdf/9650920)

**A**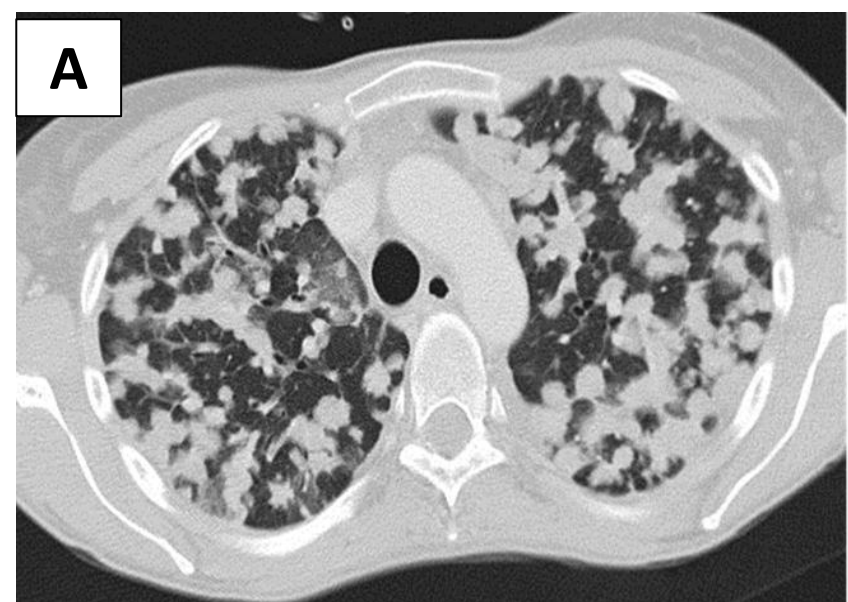**B**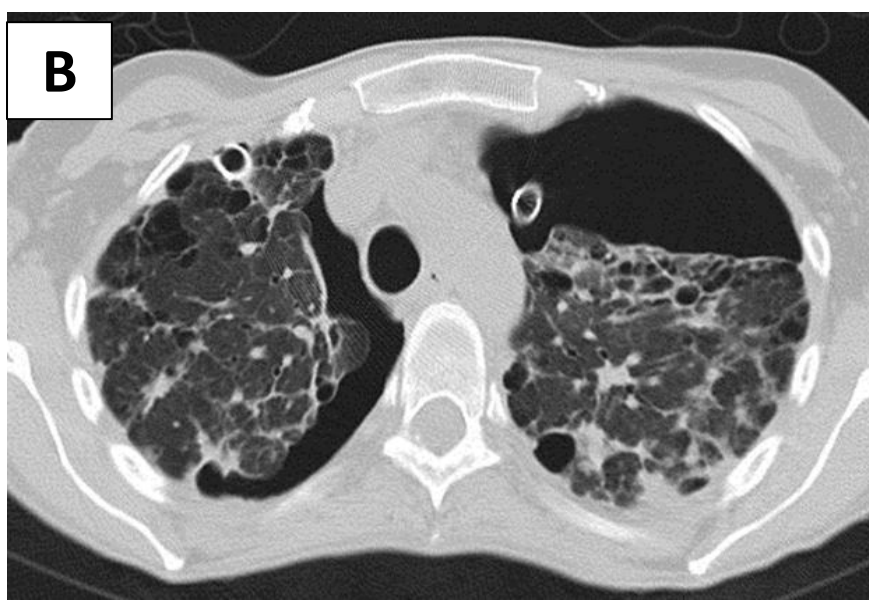**C**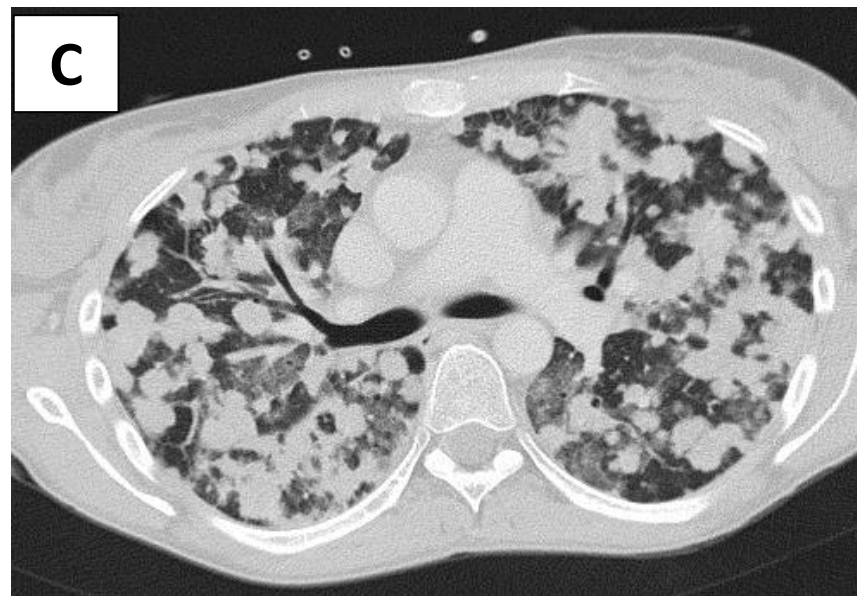**D**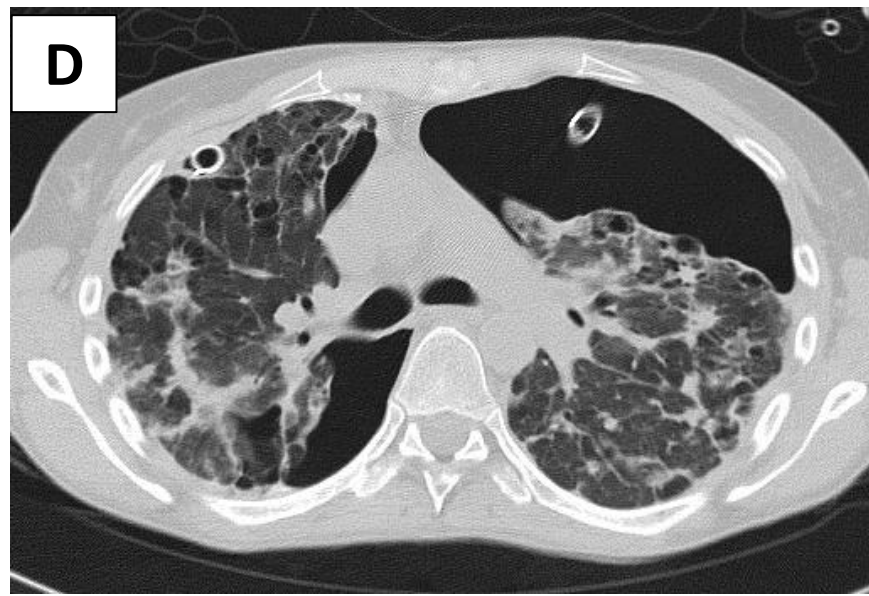

Supplement: MOESM1 [file 9650920]
